# Supplementary material for: Metal-Organic Framework-Derived NiSe Embedded into a Porous Multi-Heteroatom Self-Doped Carbon Matrix as a Promising Anode for Sodium-Ion Battery
Source: MDPI journal article supplement (doi:10.3390/nano12193345), 2022-09-26
Supplement: s1 [file s1]

# Supporting Information

## Metal–Organic Framework-Derived NiSe Embedded into a Porous Multi-Heteroatom Self-Doped Carbon Matrix as a Promising Anode for Sodium-Ion Battery

Xiaoyan Shi <sup>†</sup>, Lujun Fang <sup>†</sup>, Handong Peng, Xizhan Deng and Zhipeng Sun <sup>\*</sup>

School of Materials and Energy, Guangdong University of Technology,  
Guangzhou 510006, China

<sup>\*</sup> Correspondence: zpsunxj@gdut.edu.cn

<sup>†</sup> These authors contributed equally to this work.

### 1. Materials and Methods

#### Preparation of NiSe@MC composites

The Ni-MOFs was synthesized by a typical hydrothermal method. First, the CTP-COOH (399 mg) ligand and  $\text{C}_4\text{H}_6\text{O}_4\text{Ni}\cdot 4\text{H}_2\text{O}$  (320 mg) were dissolved in 35 mL of DMF, and the mixture was stirred at room temperature for five minutes, and then the light-green precipitate was isolated from the solution by centrifugation and further washed with DMF and THF several times, and it was further dried at 70 °C overnight.

To obtain the Ni@MC, 1 g Ni-MOFs was annealed at 600 °C for 2 h in Ar atmosphere with a rate of 1 °C·min<sup>-1</sup>.

To prepare the NiSe@MC, 0.316 g Se power was dissolved in 10 mL 80%  $\text{N}_2\text{H}_4\cdot\text{H}_2\text{O}$  and stirred for 10 min, then 0.18 g Ni@MC and 50 mL  $\text{H}_2\text{O}$  were added into the solution and stirred for another 30 min. Then, the mixture was transferred into 100 mL Teflon-lined autoclave and maintained at 200 °C for 12 h. The synthesized products were washed with distilled water and ethanol three times. Then, the products were dried at 80 °C for 10 h in a vacuum oven and then annealed at 600 °C for 2 h under Ar atmosphere.

### 2. Materials characterization

The X-ray diffraction (XRD) patterns, morphologies and the elemental mapping were test on a X-ray diffractometer (Bruker D8 ADVANCE, Cu  $\text{K}\alpha$  radiation), field emission scanning electron microscopy (FESEM, JEOL JSM-6700F) and transmission electron microscopy (TEM, FEI Thermo Talos F200S), respectively. Energy dispersive X-ray (EDX) measurements were performed on an FEI Quanta 250 FEG SEM. X-ray photoelectron spectroscopy (XPS) spectra were performed on an X-ray photoelectron spectrometer (Thermo Fisher ESCALAB 250Xi). Thermogravimetric analyzer (Mettler, 3+/1600HT) were used to determine NiSe@MC in the composite.  $\text{N}_2$  adsorption/desorption was conducted by using a Micromeritics ASAP2460 instrument. The specific surface area was collected using the Brunauer-Emmett-Teller (BET) method, and the pore size distribution was calculated from the adsorption branch of the isotherm.

### 3. Electrochemical measurements

The active material, acetylene black and CMC (7:2:1, w/w/w) were mixed with distilled water.) to form a slurry. Then the mixture was uniformly applied onto an Cu foil and vacuum-dried at 60 °C for 12 h. The mass loading of active material was 0.85-1.1 mg cm<sup>-2</sup>. A glass fiber membrane and Na-metal foil were used as separator and counter electrode. The electrolyte was

NaPF<sub>6</sub> soluble in Diglyme, The cell were galvanostatically charged/discharged at battery testing system (Shenzhen Neware Battery Co., China). Both cyclic voltammetry (CV) and electrochemical impedance spectroscopy (EIS) were tested by an electrochemical workstation (CHI760e, China) with a scanning speed of 0.1 mV s<sup>-1</sup> at 0.01 V~3 V, and in a frequency ranging from 10<sup>-2</sup> Hz to 10<sup>5</sup> Hz.

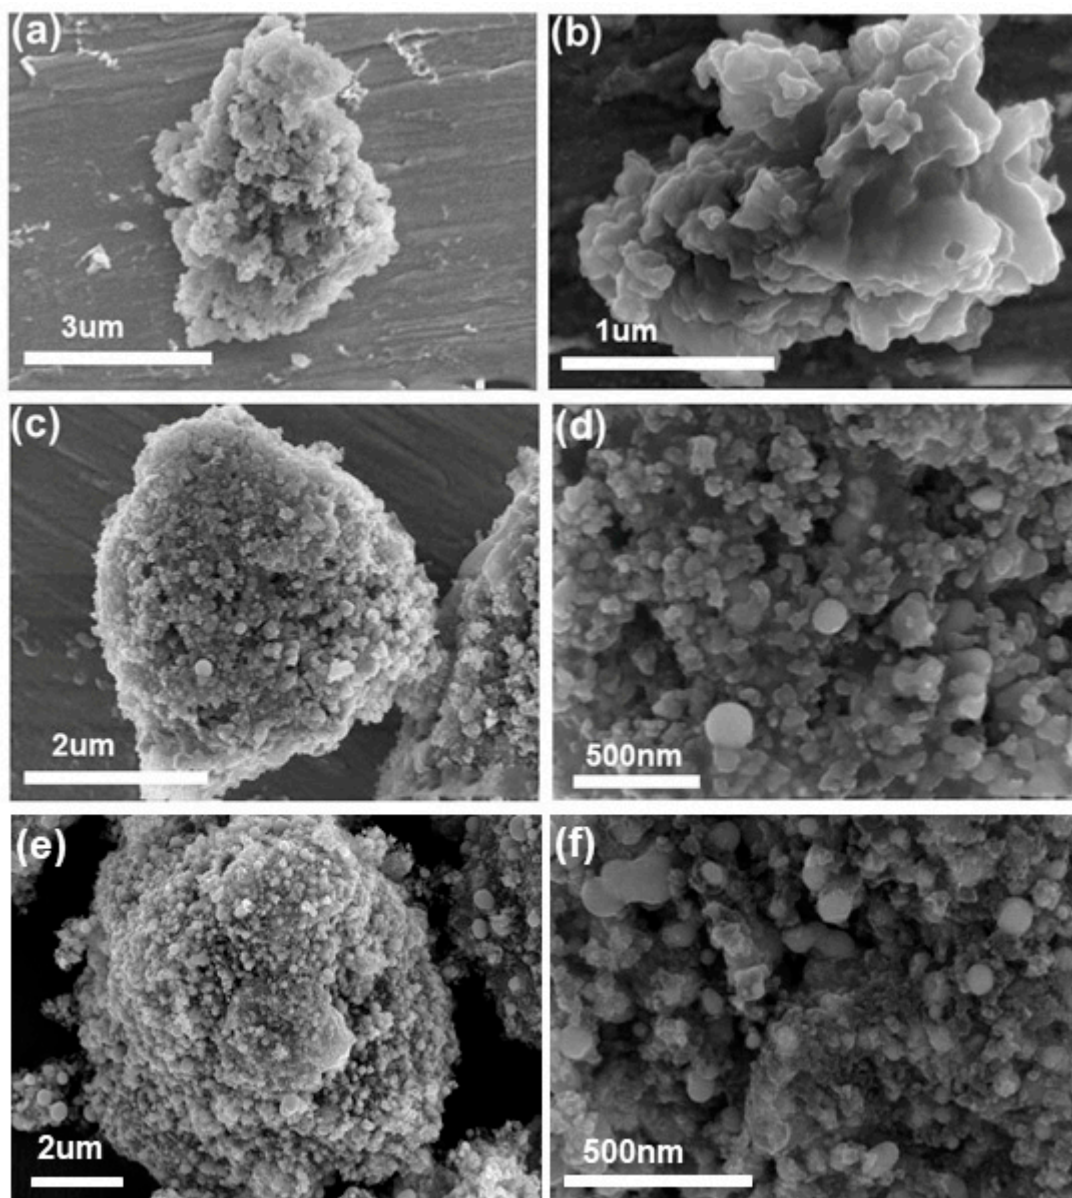

**Figure S1.** SEM images of Ni-MOFs (a,b), Ni@MC (c,d), and NiSe@MC (e,f).

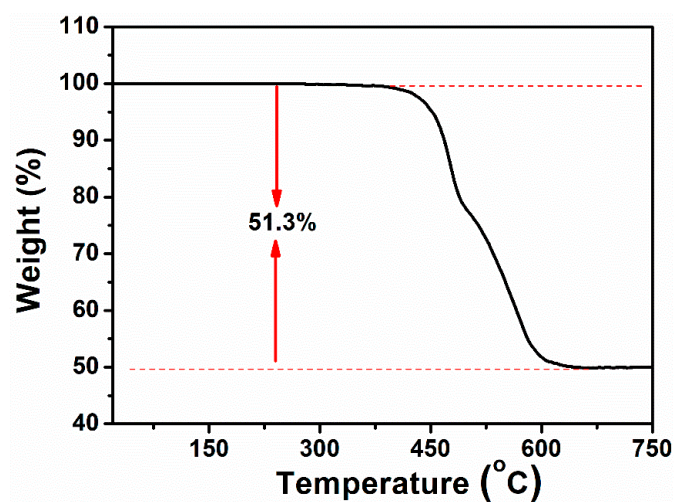

**Figure S2.** TGA curve of NiSe@MC.

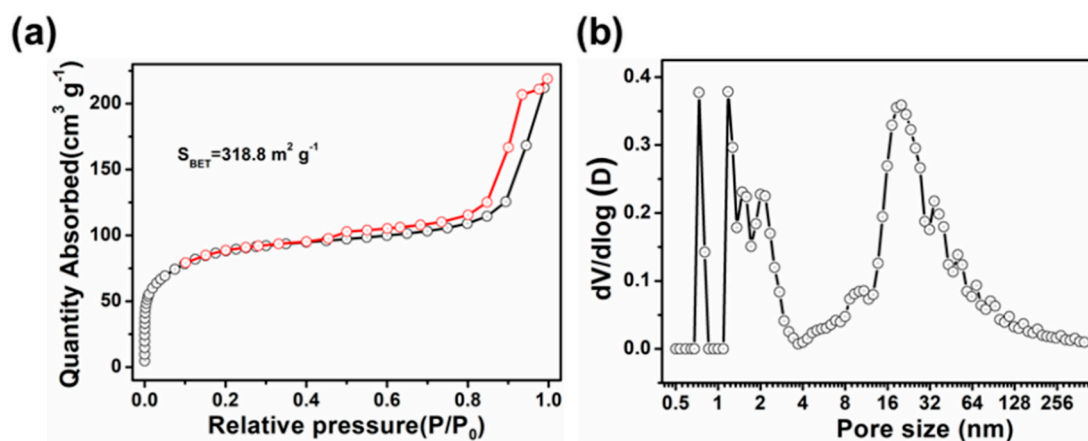

**Figure S3.** Nitrogen adsorption-desorption isotherms (a) and pore size distribution curves (b) of NiSe@MC.

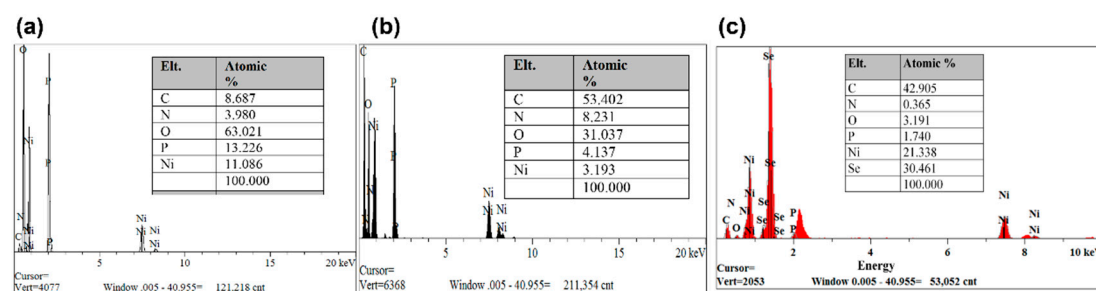

**Figure S4.** EDS analysis spectrum of Ni-MOF (a), Ni@MC (b), and NiSe@MC (c).

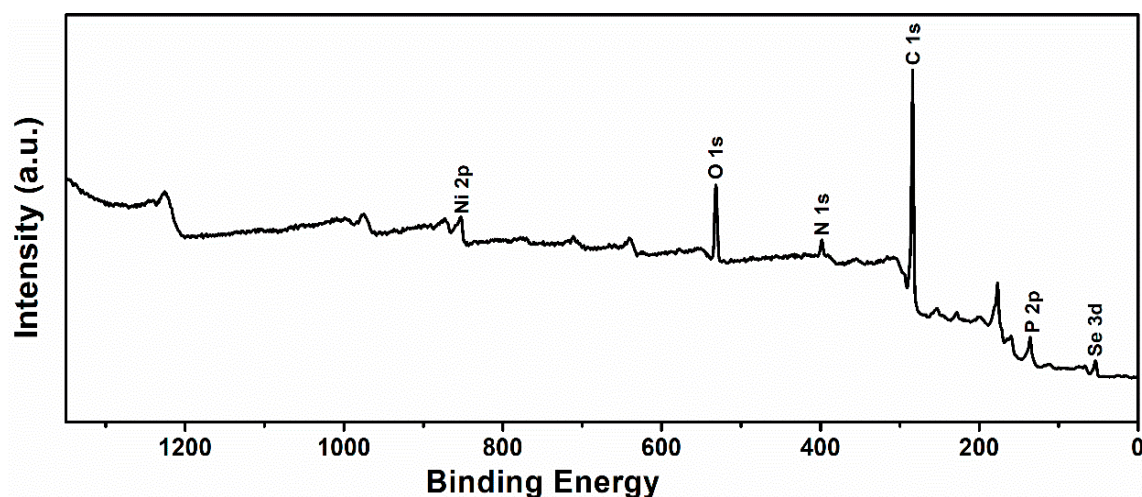

**Figure S5.** XPS survey spectrum of NiSe@MC.

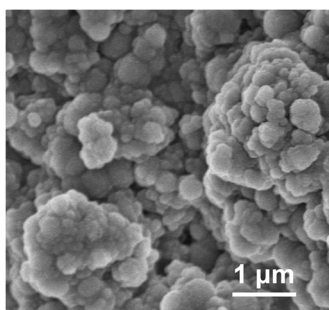

**Figure S6.** SEM image of NiSe@MC electrode after 200 cycling tests at 1 A g<sup>-1</sup>.

**Table S1.** Previously reported NiSe-based analogues and their application in SIBs.

| Materials.   | Morphology                   | Voltage window (V vs. Na/Na <sup>+</sup> ) | Voltage of discharge platforms (V vs. Na/Na <sup>+</sup> ) | Cycle number | Capacity (mAh g <sup>-1</sup> ) (A g <sup>-1</sup> ) | Ref. |
|--------------|------------------------------|--------------------------------------------|------------------------------------------------------------|--------------|------------------------------------------------------|------|
| NiSe/rGO     | Nanoparticles and nanosheets | 0-3                                        | 1.0, 1.35                                                  | 50           | 378 (0.05)                                           | 35   |
| NiSe@C       | hollow microspheres          | 0.5-3.0                                    | 1.11, 1.44                                                 | 100<br>2000  | 276.4 (0.3)<br>160 (3)                               | 21   |
| NiSe@C@NCNFs | nanofibers                   | 0.01-3.0                                   | 0.96                                                       | 100<br>1000  | 374 (0.1)<br>164 (2)                                 | 36   |
| P-NiSe@C     | Particles on the             | 0.01-3.0                                   | 0.99, 1.25                                                 | 100          | 598.2                                                | 16   |

|         |                                |          |                     |              |              |           |
|---------|--------------------------------|----------|---------------------|--------------|--------------|-----------|
|         | cole pollen                    |          |                     |              | (0.2)        |           |
| NiSe/C  | core-shell like                | 0.01–3.0 | 1.1, 1.2            | 50           | 280<br>(0.1) | 37        |
|         | <b>Multi-heteroatom</b>        |          |                     |              | <b>568.9</b> |           |
| NiSe@MC | doped                          | 0.01-3.0 | 1.46, 1.12,<br>0.63 | 1000<br>1200 | (1)<br>227.8 | this work |
|         | carbonaceous<br>NiSe particles |          |                     |              | (5)          |           |

## References

1. Liu, Y.; Wang, X. Reduced Graphene Oxides Decorated NiSe Nanoparticles as High Performance Electrodes for Na/Li Storage. *Materials* **2019**, *12*, 3709.
2. Cu, Q.; Shang, C.; Hu, L.; Zhou, G.; Wang, X. Freestanding carbon nanofibers encapsulating MOF-derived NiSe with in-situ porous carbon protective layer for sodium storage. *Appl. Surf. Sci.* **2022**, *579*, 152181.
3. Zhang, Z.; Shi, X.; Yang, X. Synthesis of core-shell NiSe/C nanospheres as anodes for lithium and sodium storage. *Electrochim. Acta* **2016**, *208*, 238–243.
